# Supplementary material for: Evaluation of Intracellular Gene Transfers from Plastome to Nuclear Genome across Progressively Improved Assemblies for Arabidopsis thaliana and Oryza sativa
Source: MDPI journal article supplement (doi:10.3390/genes13091620), 2022-09-09
Supplement: s1 [file s1]

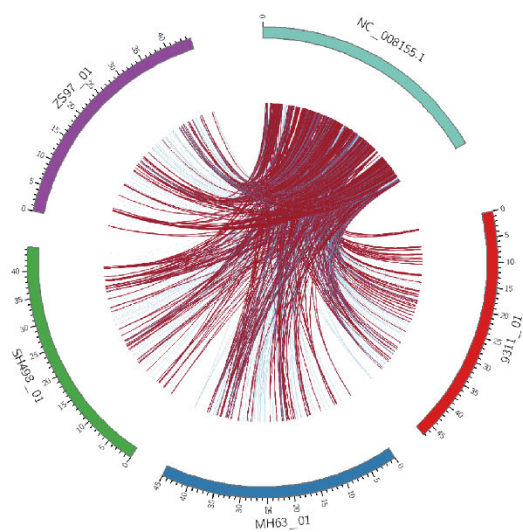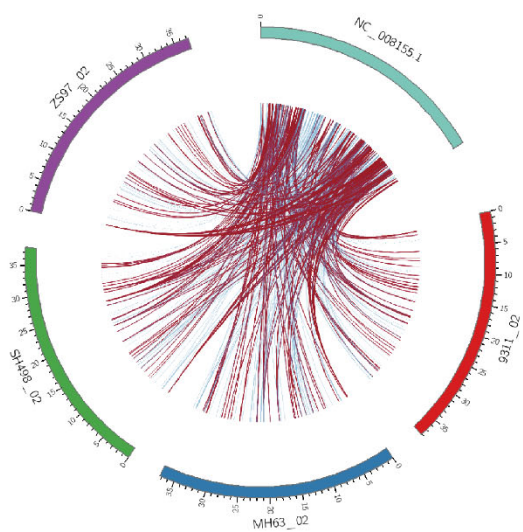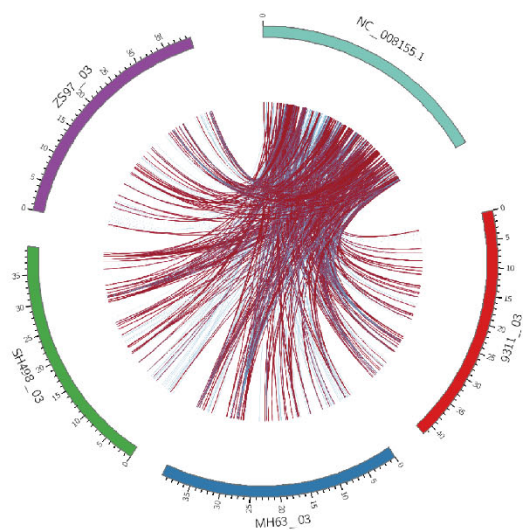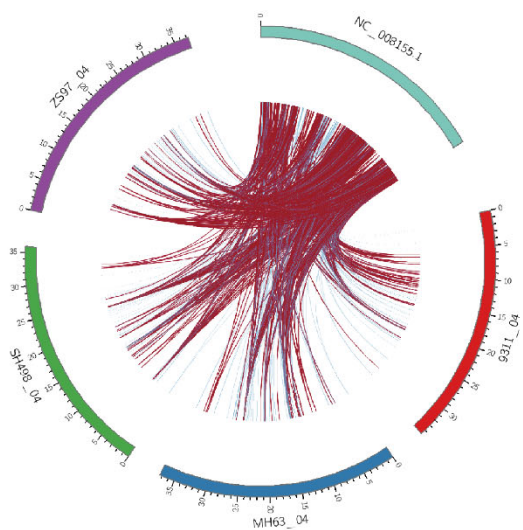

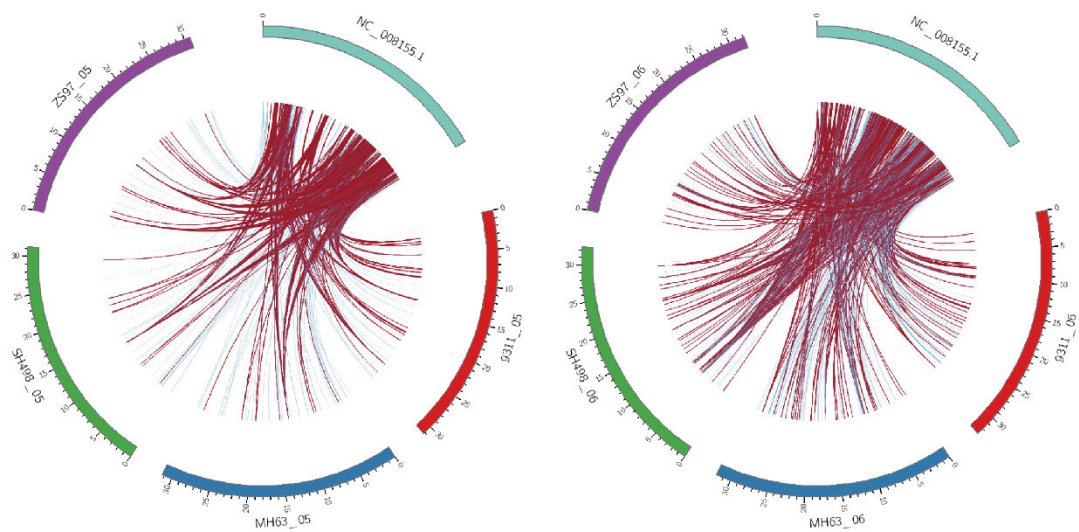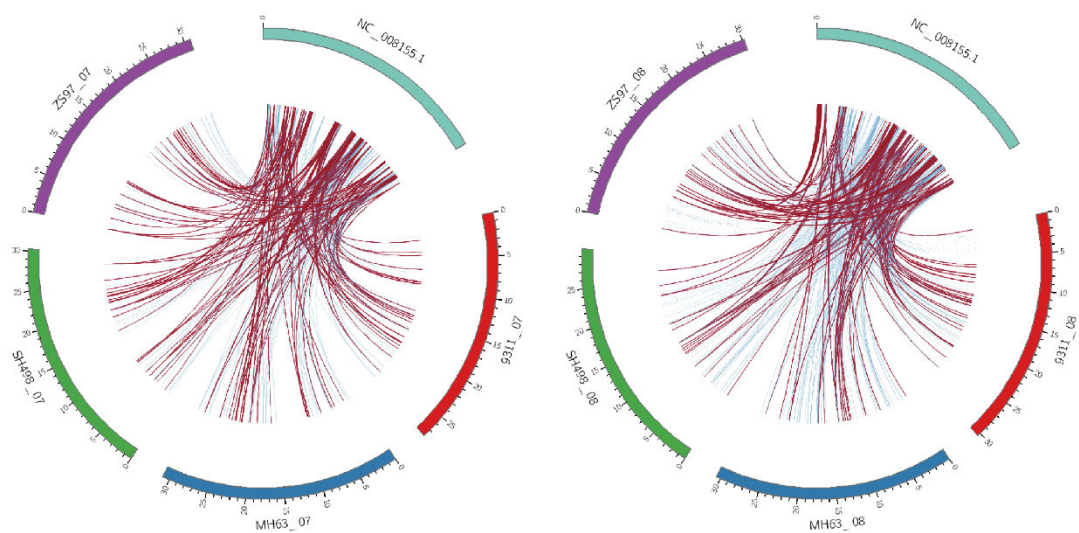

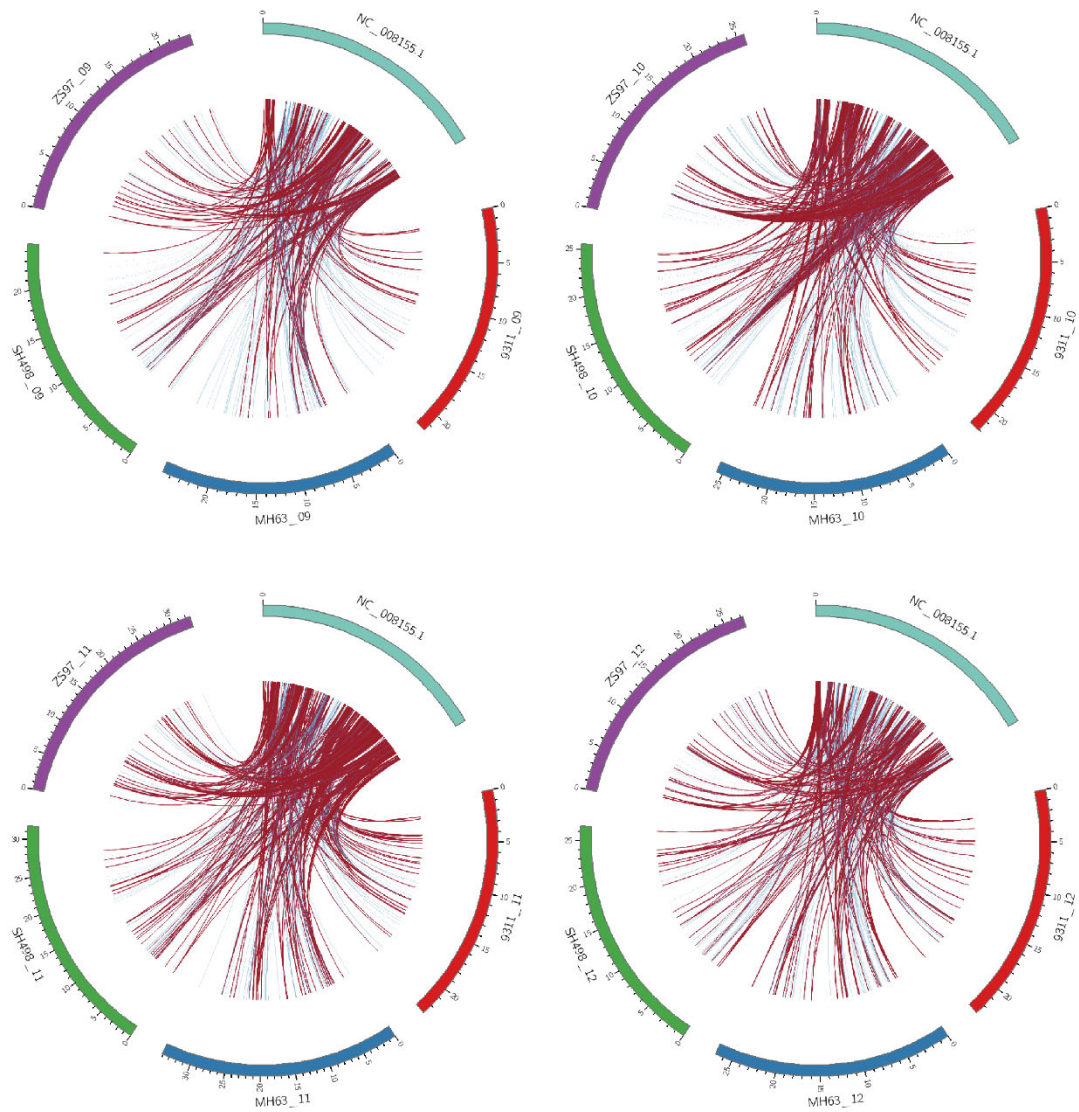

**Figure S8.** Distribution of plastome sequences in chromosomes 01-12 of four assembled versions of the nuclear genome in *O. sativa*. The red lines represent the transferred sequences of plastome-to-chromosome when the identity is greater than 95% and the length is greater than 100 bp, and the blue lines represent all transfer fragments except for the specific category mentioned above when the identity is greater than 80%. Accession number: *O. sativa*, NC\_008155.1.
