# Supplementary material for: Evaluation of Intracellular Gene Transfers from Plastome to Nuclear Genome across Progressively Improved Assemblies for Arabidopsis thaliana and Oryza sativa
Source: MDPI journal article supplement (doi:10.3390/genes13091620), 2022-09-09
Supplement: s1 [file s1]

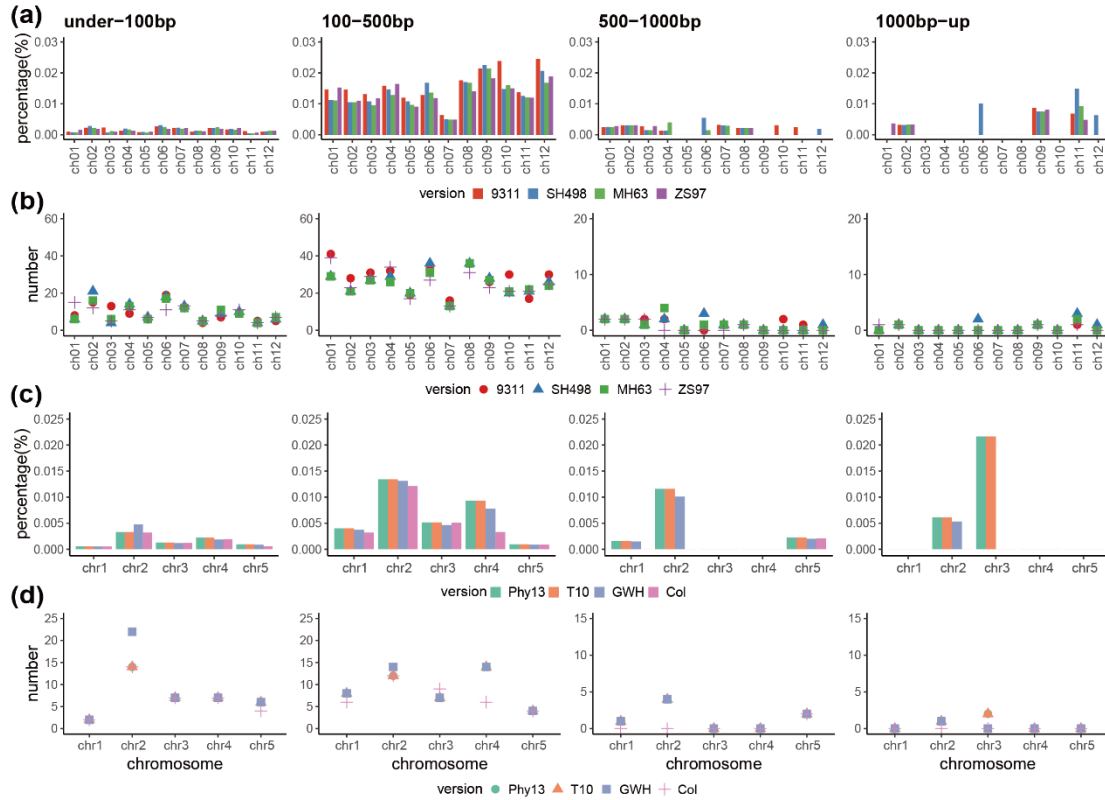

**Figure S5.** The length ratio and number of transferred plastome sequences in nuclear chromosomes in *O. sativa* and *A. thaliana* with the 80-95% identity. (a). Length proportion of plastome transfers to nuclear chromosomes in *O. sativa* across four different size categories. (b). The number of plastome sequences transferred to nuclear chromosomes in *O. sativa* across four different size categories. (c). Length proportion of plastome transfers to nuclear chromosomes in *A. thaliana* across four different size categories. (d). The number of plastome sequences transferred to nuclear chromosomes in *A. thaliana* across four different size categories. The bar charts represent the relative length of all transferred fragments to the total length of each nuclear chromosome as a percent, assembly versions are ordered along the x axis oldest to newest.
