# Supplementary material for: Evaluation of Intracellular Gene Transfers from Plastome to Nuclear Genome across Progressively Improved Assemblies for Arabidopsis thaliana and Oryza sativa
Source: MDPI journal article supplement (doi:10.3390/genes13091620), 2022-09-09
Supplement: s1 [file s1]

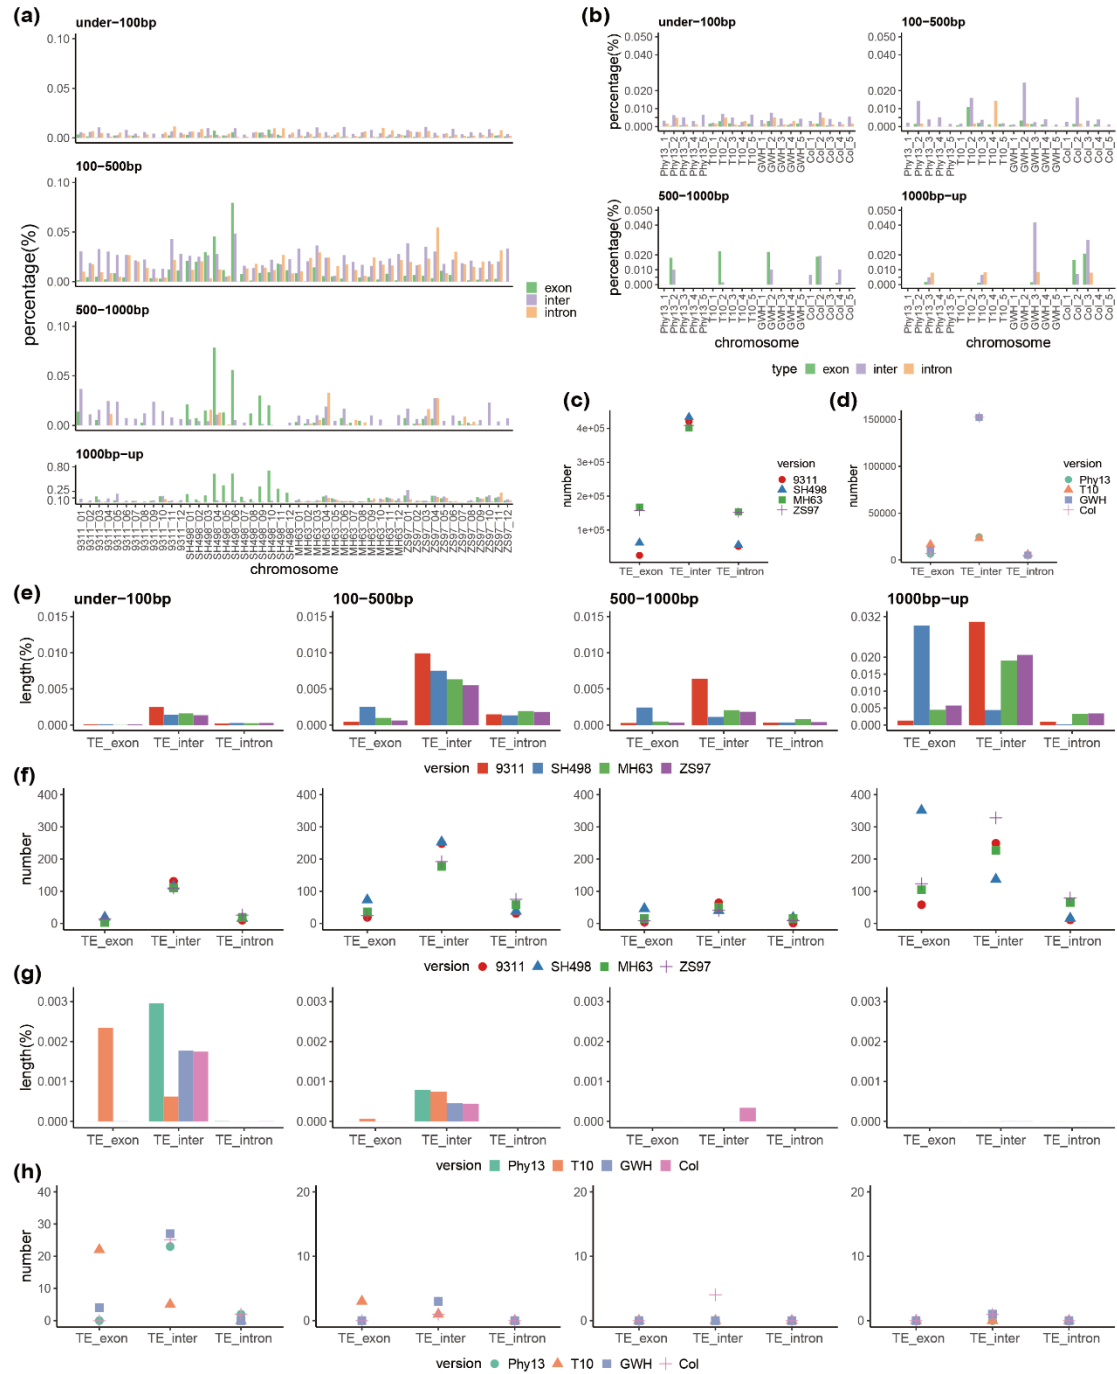

**Figure S12.** Correlation analysis of plastome transfer to nuclear genomic regions. (a). The length proportion of the plastome transfer to genic regions on each chromosome in *O. sativa*. (b). The length proportion of the plastome transfer to genic regions on each chromosome in *A. thaliana*. (c). The total number of TEs of plastome transferred to genic regions in *O. sativa*. (d). The total number of TEs of plastome transferred to genic regions in *A. thaliana*. (e). Intersection statistics of the length proportion of TEs of plastome transferred to genic regions in *O. sativa*. (f). Intersection statistics of the number of TEs of plastome transferred to genic regions in *O. sativa*. (g). Intersection statistics of the length proportion of TEs of plastome transferred to genic regions of *A. thaliana*. (h). Intersection statistics of the number of TEs of plastome transferred to genic regions of *A. thaliana*.
