# Supplementary material for: Evaluation of Intracellular Gene Transfers from Plastome to Nuclear Genome across Progressively Improved Assemblies for Arabidopsis thaliana and Oryza sativa
Source: MDPI journal article supplement (doi:10.3390/genes13091620), 2022-09-09
Supplement: s1 [file s1]

## Report

|                                 | 9311      |
|---------------------------------|-----------|
| # contigs ( $\geq 0$ bp)        | 10490     |
| # contigs ( $\geq 1000$ bp)     | 10490     |
| # contigs ( $\geq 5000$ bp)     | 2745      |
| # contigs ( $\geq 10000$ bp)    | 864       |
| # contigs ( $\geq 25000$ bp)    | 154       |
| # contigs ( $\geq 50000$ bp)    | 37        |
| Total length ( $\geq 0$ bp)     | 426337286 |
| Total length ( $\geq 1000$ bp)  | 426337286 |
| Total length ( $\geq 5000$ bp)  | 402663190 |
| Total length ( $\geq 10000$ bp) | 390119002 |
| Total length ( $\geq 25000$ bp) | 379684703 |
| Total length ( $\geq 50000$ bp) | 375832623 |
| # contigs                       | 10490     |
| Largest contig                  | 47244934  |
| Total length                    | 426337286 |
| GC (%)                          | 43.50     |
| N50                             | 31162561  |
| N75                             | 22947966  |
| L50                             | 6         |
| L75                             | 10        |
| # N's per 100 kbp               | 3678.09   |

All statistics are based on contigs of size  $\geq 500$  bp, unless otherwise noted (e.g., "# contigs ( $\geq 0$  bp)" and "Total length ( $\geq 0$  bp)" include all contigs).

## Report

|                                 | 5H498     |
|---------------------------------|-----------|
| # contigs ( $\geq 0$ bp)        | 14        |
| # contigs ( $\geq 1000$ bp)     | 14        |
| # contigs ( $\geq 5000$ bp)     | 14        |
| # contigs ( $\geq 10000$ bp)    | 14        |
| # contigs ( $\geq 25000$ bp)    | 14        |
| # contigs ( $\geq 50000$ bp)    | 14        |
| Total length ( $\geq 0$ bp)     | 390983850 |
| Total length ( $\geq 1000$ bp)  | 390983850 |
| Total length ( $\geq 5000$ bp)  | 390983850 |
| Total length ( $\geq 10000$ bp) | 390983850 |
| Total length ( $\geq 25000$ bp) | 390983850 |
| Total length ( $\geq 50000$ bp) | 390983850 |
| # contigs                       | 14        |
| Largest contig                  | 44361539  |
| Total length                    | 390983850 |
| GC (%)                          | 43.62     |
| N50                             | 31778392  |
| N75                             | 29952003  |
| L50                             | 6         |
| L75                             | 9         |
| # N's per 100 kbp               | 12.79     |

All statistics are based on contigs of size  $\geq 500$  bp, unless otherwise noted (e.g., "# contigs ( $\geq 0$  bp)" and "Total length ( $\geq 0$  bp)" include all contigs).

### Report

|                                 | MH63      |
|---------------------------------|-----------|
| # contigs ( $\geq 0$ bp)        | 12        |
| # contigs ( $\geq 1000$ bp)     | 12        |
| # contigs ( $\geq 5000$ bp)     | 12        |
| # contigs ( $\geq 10000$ bp)    | 12        |
| # contigs ( $\geq 25000$ bp)    | 12        |
| # contigs ( $\geq 50000$ bp)    | 12        |
| Total length ( $\geq 0$ bp)     | 395765488 |
| Total length ( $\geq 1000$ bp)  | 395765488 |
| Total length ( $\geq 5000$ bp)  | 395765488 |
| Total length ( $\geq 10000$ bp) | 395765488 |
| Total length ( $\geq 25000$ bp) | 395765488 |
| Total length ( $\geq 50000$ bp) | 395765488 |
| # contigs                       | 12        |
| Largest contig                  | 45027022  |
| Total length                    | 395765488 |
| GC (%)                          | 43.65     |
| N50                             | 31921180  |
| N75                             | 30492302  |
| L50                             | 6         |
| L75                             | 9         |
| # N's per 100 kbp               | 0.00      |

All statistics are based on contigs of size  $\geq 500$  bp, unless otherwise noted (e.g., "# contigs ( $\geq 0$  bp)" and "Total length ( $\geq 0$  bp)" include all contigs).

### Report

|                                 | Z597      |
|---------------------------------|-----------|
| # contigs ( $\geq 0$ bp)        | 12        |
| # contigs ( $\geq 1000$ bp)     | 12        |
| # contigs ( $\geq 5000$ bp)     | 12        |
| # contigs ( $\geq 10000$ bp)    | 12        |
| # contigs ( $\geq 25000$ bp)    | 12        |
| # contigs ( $\geq 50000$ bp)    | 12        |
| Total length ( $\geq 0$ bp)     | 391561630 |
| Total length ( $\geq 1000$ bp)  | 391561630 |
| Total length ( $\geq 5000$ bp)  | 391561630 |
| Total length ( $\geq 10000$ bp) | 391561630 |
| Total length ( $\geq 25000$ bp) | 391561630 |
| Total length ( $\geq 50000$ bp) | 391561630 |
| # contigs                       | 12        |
| Largest contig                  | 44754788  |
| Total length                    | 391561630 |
| GC (%)                          | 43.62     |
| N50                             | 32119910  |
| N75                             | 30264782  |
| L50                             | 6         |
| L75                             | 9         |
| # N's per 100 kbp               | 0.00      |

All statistics are based on contigs of size  $\geq 500$  bp, unless otherwise noted (e.g., "# contigs ( $\geq 0$  bp)" and "Total length ( $\geq 0$  bp)" include all contigs).

**Figure S2.** Results of QUAST assessment of the four versions of the *O. sativa* nuclear genome.
