# Supplementary material for: Evaluation of Intracellular Gene Transfers from Plastome to Nuclear Genome across Progressively Improved Assemblies for Arabidopsis thaliana and Oryza sativa
Source: MDPI journal article supplement (doi:10.3390/genes13091620), 2022-09-09
Supplement: s1 [file s1]

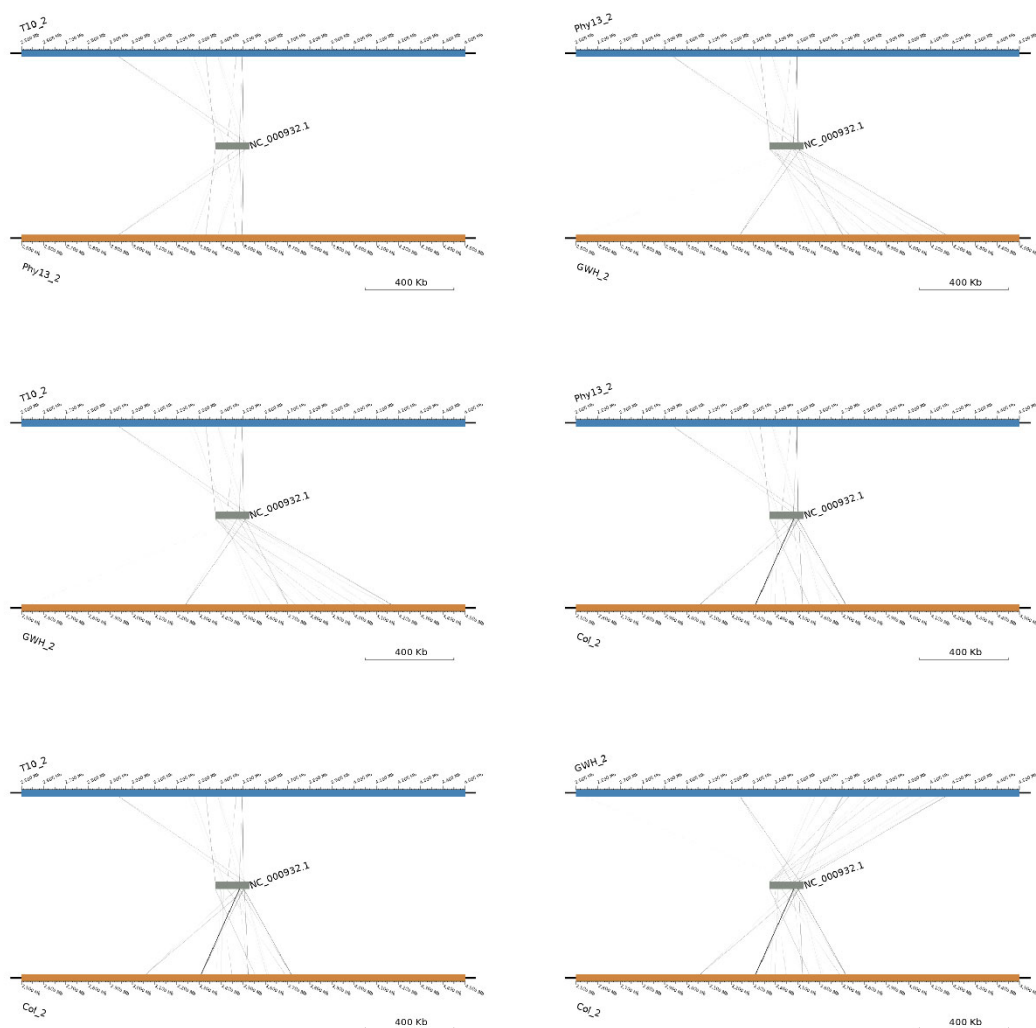

**Figure S9.** Differences in the distribution of transferred fragments from plastome to chr2 in the same length category of chromosomes in *A. thaliana*.
