# Supplementary material for: Evaluation of Intracellular Gene Transfers from Plastome to Nuclear Genome across Progressively Improved Assemblies for Arabidopsis thaliana and Oryza sativa
Source: MDPI journal article supplement (doi:10.3390/genes13091620), 2022-09-09
Supplement: s1 [file s1]

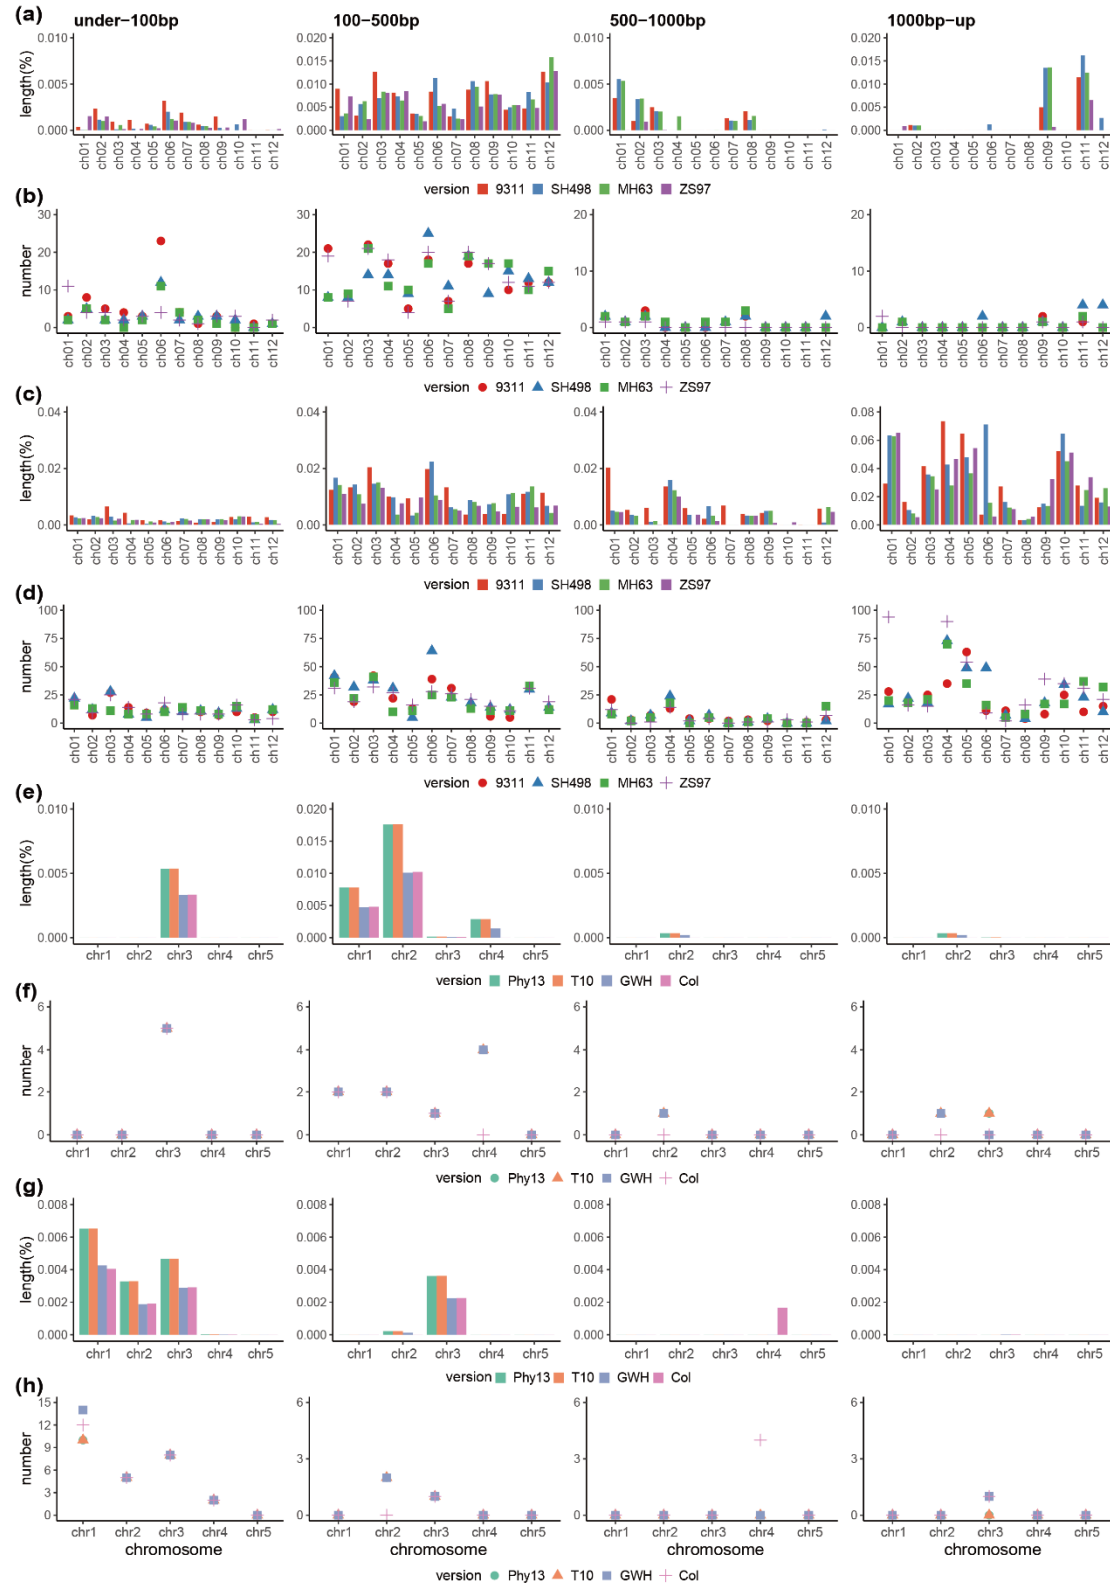

**Figure S13.** The content of TE in the corresponding category of plastome transferred to nuclear chromosomes both in *O. sativa* and *A. thaliana*. (a). The length proportion of TEs of plastome transferred to nuclear chromosomes in the 80-95% identity category in *O. sativa*. (b). The number of TEs of plastome transferred to nuclear chromosomes in the 80-95% identity category in *O. sativa*. (c). The length proportion of TEs of plastome transferred to nuclear chromosomes in the 95% and

higher identity category in *O. sativa*. (d). The number of TEs of plastome transferred to nuclear chromosomes in the 95% and higher identity category in *O. sativa*. (e). The length proportion of TEs of plastome transferred to nuclear chromosomes in the 80-95% identity category in *A. thaliana*. (f). The number of TEs of plastome transferred to nuclear chromosomes in the 80-95% identity category in *A. thaliana*. (g). The length proportion of TEs of plastome transferred to nuclear chromosomes in the 95% and higher identity category in *A. thaliana*. (h). The number of TEs of plastome transferred to nuclear chromosomes in the 95% and higher identity category in *A. thaliana*.
