# Supplementary material for: Evaluation of Intracellular Gene Transfers from Plastome to Nuclear Genome across Progressively Improved Assemblies for Arabidopsis thaliana and Oryza sativa
Source: MDPI journal article supplement (doi:10.3390/genes13091620), 2022-09-09
Supplement: s1 [file s1]

## Report

|                                 | Phy13     |
|---------------------------------|-----------|
| # contigs ( $\geq 0$ bp)        | 7         |
| # contigs ( $\geq 1000$ bp)     | 7         |
| # contigs ( $\geq 5000$ bp)     | 7         |
| # contigs ( $\geq 10000$ bp)    | 7         |
| # contigs ( $\geq 25000$ bp)    | 7         |
| # contigs ( $\geq 50000$ bp)    | 7         |
| Total length ( $\geq 0$ bp)     | 119667750 |
| Total length ( $\geq 1000$ bp)  | 119667750 |
| Total length ( $\geq 5000$ bp)  | 119667750 |
| Total length ( $\geq 10000$ bp) | 119667750 |
| Total length ( $\geq 25000$ bp) | 119667750 |
| Total length ( $\geq 50000$ bp) | 119667750 |
| # contigs                       | 7         |
| Largest contig                  | 30427671  |
| Total length                    | 119667750 |
| GC (%)                          | 36.06     |
| N50                             | 23459830  |
| N75                             | 19698289  |
| L50                             | 3         |
| L75                             | 4         |
| # N's per 100 kbp               | 155.60    |

All statistics are based on contigs of size  $\geq 500$  bp, unless otherwise noted (e.g., "# contigs ( $\geq 0$  bp)" and "Total length ( $\geq 0$  bp)" include all contigs).

## Report

|                                 | T10       |
|---------------------------------|-----------|
| # contigs ( $\geq 0$ bp)        | 7         |
| # contigs ( $\geq 1000$ bp)     | 7         |
| # contigs ( $\geq 5000$ bp)     | 7         |
| # contigs ( $\geq 10000$ bp)    | 7         |
| # contigs ( $\geq 25000$ bp)    | 7         |
| # contigs ( $\geq 50000$ bp)    | 7         |
| Total length ( $\geq 0$ bp)     | 119668634 |
| Total length ( $\geq 1000$ bp)  | 119668634 |
| Total length ( $\geq 5000$ bp)  | 119668634 |
| Total length ( $\geq 10000$ bp) | 119668634 |
| Total length ( $\geq 25000$ bp) | 119668634 |
| Total length ( $\geq 50000$ bp) | 119668634 |
| # contigs                       | 7         |
| Largest contig                  | 30427671  |
| Total length                    | 119668634 |
| GC (%)                          | 36.06     |
| N50                             | 23459830  |
| N75                             | 19698289  |
| L50                             | 3         |
| L75                             | 4         |
| # N's per 100 kbp               | 155.60    |

All statistics are based on contigs of size  $\geq 500$  bp, unless otherwise noted (e.g., "# contigs ( $\geq 0$  bp)" and "Total length ( $\geq 0$  bp)" include all contigs).

## Report

|                                 | GWH       |
|---------------------------------|-----------|
| # contigs ( $\geq 0$ bp)        | 5         |
| # contigs ( $\geq 1000$ bp)     | 5         |
| # contigs ( $\geq 5000$ bp)     | 5         |
| # contigs ( $\geq 10000$ bp)    | 5         |
| # contigs ( $\geq 25000$ bp)    | 5         |
| # contigs ( $\geq 50000$ bp)    | 5         |
| Total length ( $\geq 0$ bp)     | 133725193 |
| Total length ( $\geq 1000$ bp)  | 133725193 |
| Total length ( $\geq 5000$ bp)  | 133725193 |
| Total length ( $\geq 10000$ bp) | 133725193 |
| Total length ( $\geq 25000$ bp) | 133725193 |
| Total length ( $\geq 50000$ bp) | 133725193 |
| # contigs                       | 5         |
| Largest contig                  | 32659241  |
| Total length                    | 133725193 |
| GC (%)                          | 36.34     |
| N50                             | 26161332  |
| N75                             | 22560461  |
| L50                             | 3         |
| L75                             | 4         |
| # N's per 100 kbp               | 0.15      |

All statistics are based on contigs of size  $\geq 500$  bp, unless otherwise noted (e.g., "# contigs ( $\geq 0$  bp)" and "Total length ( $\geq 0$  bp)" include all contigs).

## Report

|                                 | Col       |
|---------------------------------|-----------|
| # contigs ( $\geq 0$ bp)        | 7         |
| # contigs ( $\geq 1000$ bp)     | 7         |
| # contigs ( $\geq 5000$ bp)     | 7         |
| # contigs ( $\geq 10000$ bp)    | 7         |
| # contigs ( $\geq 25000$ bp)    | 7         |
| # contigs ( $\geq 50000$ bp)    | 7         |
| Total length ( $\geq 0$ bp)     | 132081078 |
| Total length ( $\geq 1000$ bp)  | 132081078 |
| Total length ( $\geq 5000$ bp)  | 132081078 |
| Total length ( $\geq 10000$ bp) | 132081078 |
| Total length ( $\geq 25000$ bp) | 132081078 |
| Total length ( $\geq 50000$ bp) | 132081078 |
| # contigs                       | 7         |
| Largest contig                  | 32540122  |
| Total length                    | 132081078 |
| GC (%)                          | 36.24     |
| N50                             | 25743512  |
| N75                             | 22217084  |
| L50                             | 3         |
| L75                             | 4         |
| # N's per 100 kbp               | 0.00      |

All statistics are based on contigs of size  $\geq 500$  bp, unless otherwise noted (e.g., "# contigs ( $\geq 0$  bp)" and "Total length ( $\geq 0$  bp)" include all contigs).

**Figure S1.** Results of QUAST assessment of the four versions of the *A. thaliana* nuclear genome.
